# Supplementary material for: Reduced SOD2 expression is associated with mortality of hepatocellular carcinoma patients in a mutant p53-dependent manner
Source: PubMed Central journal article supplement (PMC4931826; doi:10.18632/aging.100967), 2016-05-23
Supplement: aging-08-1184-s001.pdf [file aging-08-1184-s001.pdf]

# SUPPLEMENTARY DATA

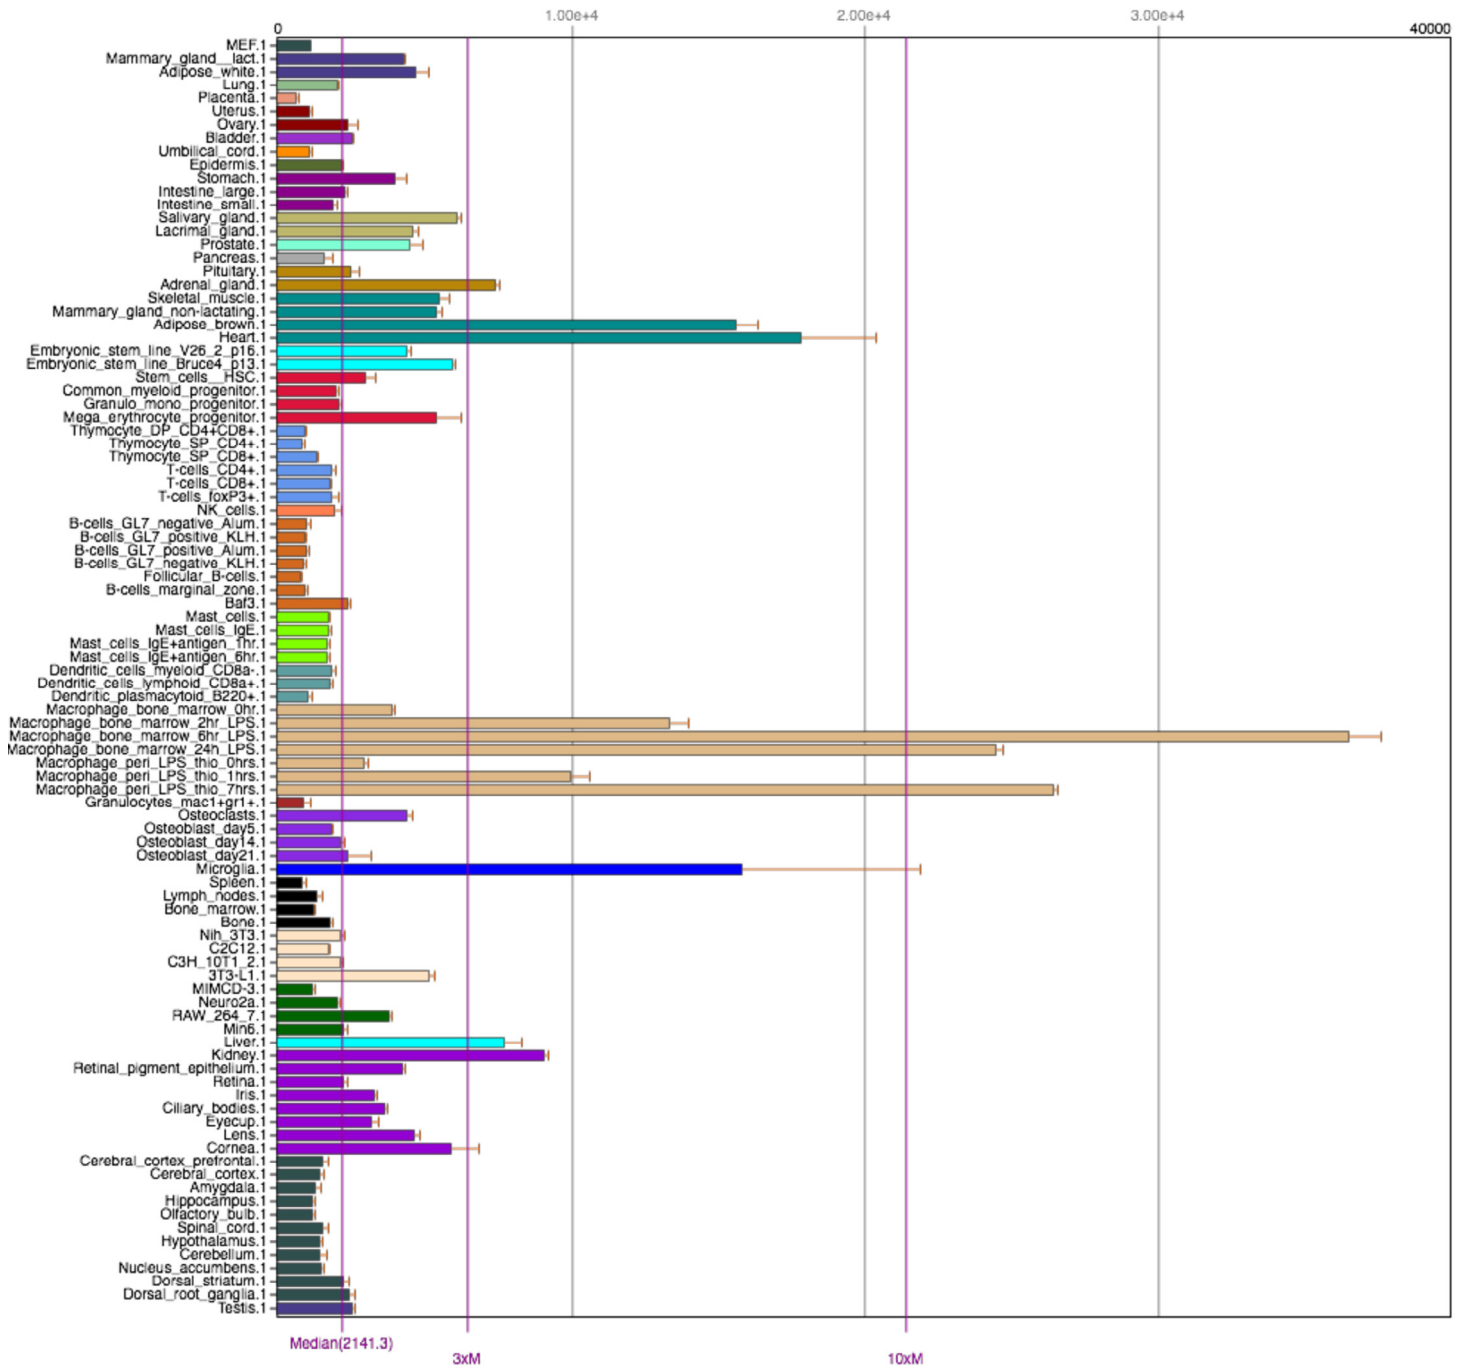

**Figure S1. Tissue-specific mRNA expression of SOD2.** Shown is mRNA expression of SOD2 in different mouse tissues. Data are generated from BioGPS ([www.biogps.org](http://www.biogps.org)).

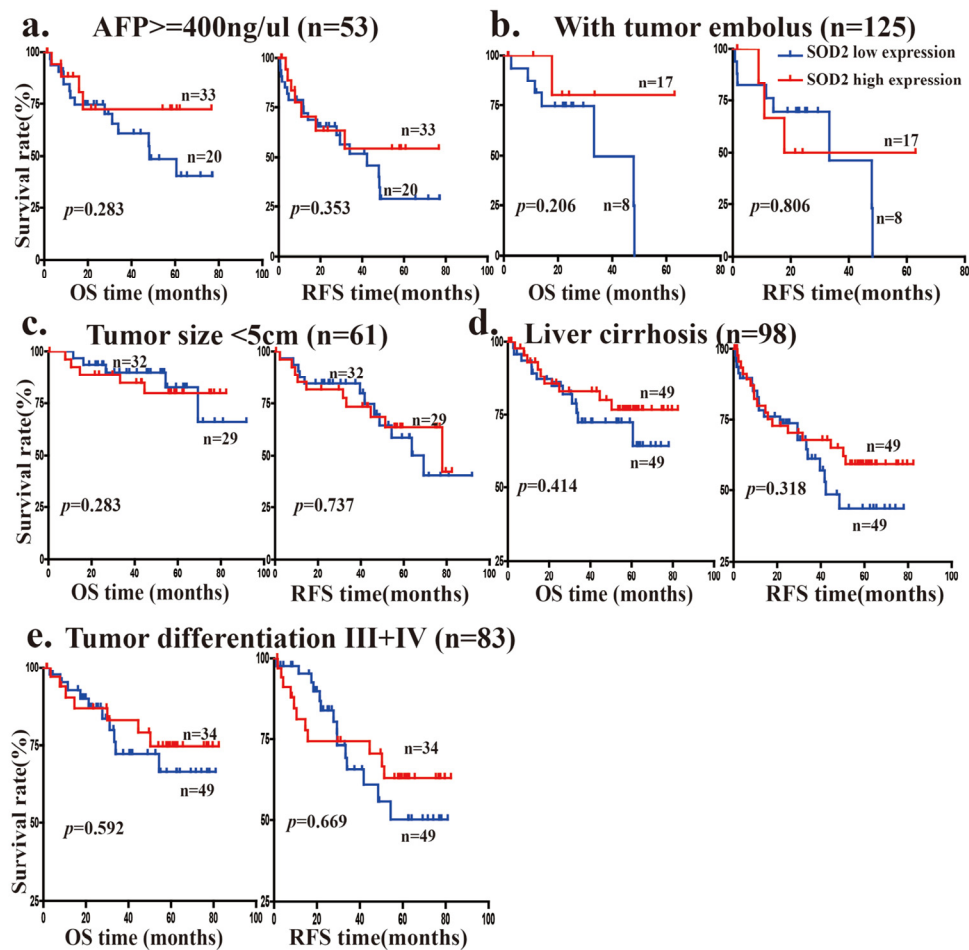

**Figure S2. Overall survival (OS) and relapse-free survival (RFS) in advanced HCC patients with different SOD2 protein expression.** The OS and RFS of 160 HCC patients with SOD2 high expression and low expression are analyzed in (a) patients with high AFP level ( $> 400 \text{ ng}/\mu\text{l}$ ), (b) patients without tumor embolus, (c) patients with tumor size  $< 5\text{cm}$ , (d) patients no liver cirrhosis, (e) patients with tumor differentiation III+IV.

**Table S1. Patients clinicopathological features**

| <b>Features</b>                    | <b>Median (range)</b>   |
|------------------------------------|-------------------------|
| <b>SOD2 expression : IHC score</b> | 180 (10-300)            |
| <b>Age: years</b>                  | 49 (23-77)              |
| <b>AFP: ng/mL</b>                  | 51.9 (0.91-724631)      |
| <b>Tumor size: cm</b>              | 6 (1-20)                |
|                                    | <b>No. of cases (%)</b> |
| <b>No. of patients</b>             | 160 (100%)              |
| <b>Tumor Differentiation</b>       |                         |
| I                                  | 18 (11.3%)              |
| II                                 | 65 (40.6%)              |
| III                                | 73 (45.6%)              |
| IV                                 | 4 (2.5%)                |
| <b>TNM Stage</b>                   |                         |
| I                                  | 100 (62.5%)             |
| II                                 | 20 (12.5%)              |
| III                                | 40 (25%)                |
| <b>BCLC Stage</b>                  |                         |
| 0                                  | 8 (5.00%)               |
| A                                  | 94 (58.8%)              |
| B                                  | 29 (18.1%)              |
| C                                  | 29 (18.1%)              |
| <b>Recurrence</b>                  |                         |
| No                                 | 97 (60.6%)              |
| Early (<24 mons)                   | 39 (24.3%)              |
| Late (≥24 mons)                    | 24 (15.1%)              |
